# Supplementary material for: Corrosion resistance of a tungsten modified AISI 430 stainless steel bipolar plate for proton exchange membrane fuel cells
Source: Royal Society of Chemistry journal article supplement (doi:10.1039/c5ra28114h), 2016-01-01
Supplement: c5ra28114h1.pdf [file c5ra28114h1.pdf]

# Electronic Supplementary Information

## Corrosion resistance of tungsten modified AISI 430 stainless steel bipolar plate for proton exchange membrane fuel cell

Jinlong Cui,<sup>a</sup> Zhendong Yao,<sup>a</sup> Fupeng Cheng,<sup>a</sup> Yongfu Cui,<sup>a</sup> Guanqin Wang,<sup>a</sup> Lixia Wang,<sup>b</sup> Hongliang Sun,<sup>a</sup> Song Li,<sup>a</sup> Zhongsheng Wen<sup>a</sup> and Juncai Sun<sup>a</sup>★

<sup>a</sup> Institute of Materials and Technology, Dalian Maritime University, Dalian 116026, China

<sup>b</sup>School of Material and Chemical Engineering, Zhengzhou University of Light Industry, Zhengzhou 475000, China

E-mail: sunjc@dlmu.edu.cn;

Tel: +86-411-84727959.

Fax: +86-411-84725960.

Table. 1S The surface roughness of untreated and W-modified 430 SS ( $R_a$  denotes the roughness average )

| Sample     | $R_{a1}$ ( $\mu\text{m}$ ) | $R_{a2}$ ( $\mu\text{m}$ ) | $R_{a3}$ ( $\mu\text{m}$ ) | $\bar{R}_a$ ( $\mu\text{m}$ ) |
|------------|----------------------------|----------------------------|----------------------------|-------------------------------|
| Untreated  | 0.03                       | 0.04                       | 0.04                       | 0.037                         |
| W-modified | 0.03                       | 0.03                       | 0.04                       | 0.033                         |
